# Supplementary material
Source: Springer Nature journal article supplement (https://www.springermedizin.de/resource/supplementary/12967_2011_831_MOESM6_ESM.pdf/9577132)

**HE**

**CD68**

**SCGF**

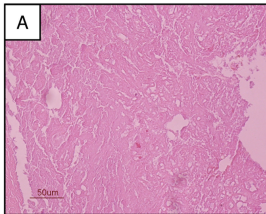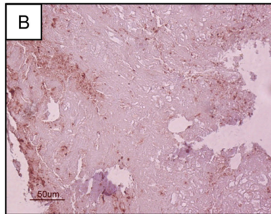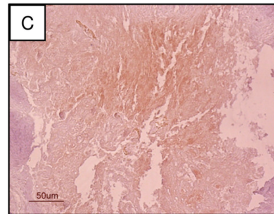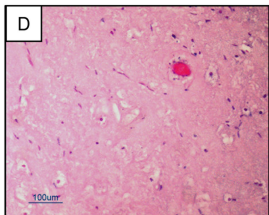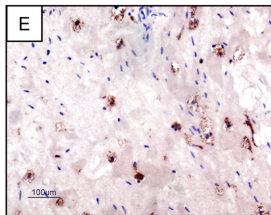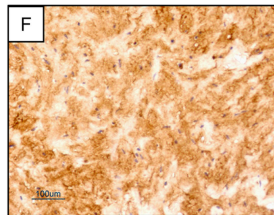

Supplement: MOESM6 [file 9577132]
